# Supplementary material for: Metabolomic Insights into the Predictive Landscape of Neoadjuvant Immunochemotherapy in Gastric Cancer: Towards Precision Medicine with Machine Learning
Source: Research Square preprint supplement (doi:10.21203/rs.3.rs-6365771/v1), 2025-05-14
Supplement: Supplementary file 1 [file acc6785e13c1dadceaee5803.docx]

**Figure S**

Figure S 1 Batch Correction of Metabolomics Data Based on Support Vector Regression.

Figure S 2 Dynamic trajectory analysis of the metabolic landscape following NAIC therapy in gastric cancer.

Figure S 3 Analysis of Differences in Metabolites Between the NAIC Treatment R Group and NR Group in GC.

Figure S 4 Development of a predictive model for the success of NAIC therapy in gastric cancer using baseline plasma metabolic profiles.

Figure S 5 Depicts the impact of clinical characteristics on the 21-PM model.

Figure S 6 Correlation analysis of key biomarkers with immune cells and clinical features.

Figure S 7 Analysis of treatment response characteristics based on metabolic dynamics and exploration of monitoring biomarkers.

Figure S 8 Construction of treatment efficacy monitoring model.

Figure S 9 Exploratory analysis of therapeutic monitoring biomarkers.

Figure S 10 Immune-related analysis of imaging-based therapeutic monitoring biomarkers.

Figure S 11 Differential feature analysis based on histopathological efficacy endpoints.

Figure S 12 Therapeutic monitoring model development based on histopathological outcomes.

Figure S 13 Immune correlation analysis of histopathology-based therapeutic monitoring biomarkers.

| 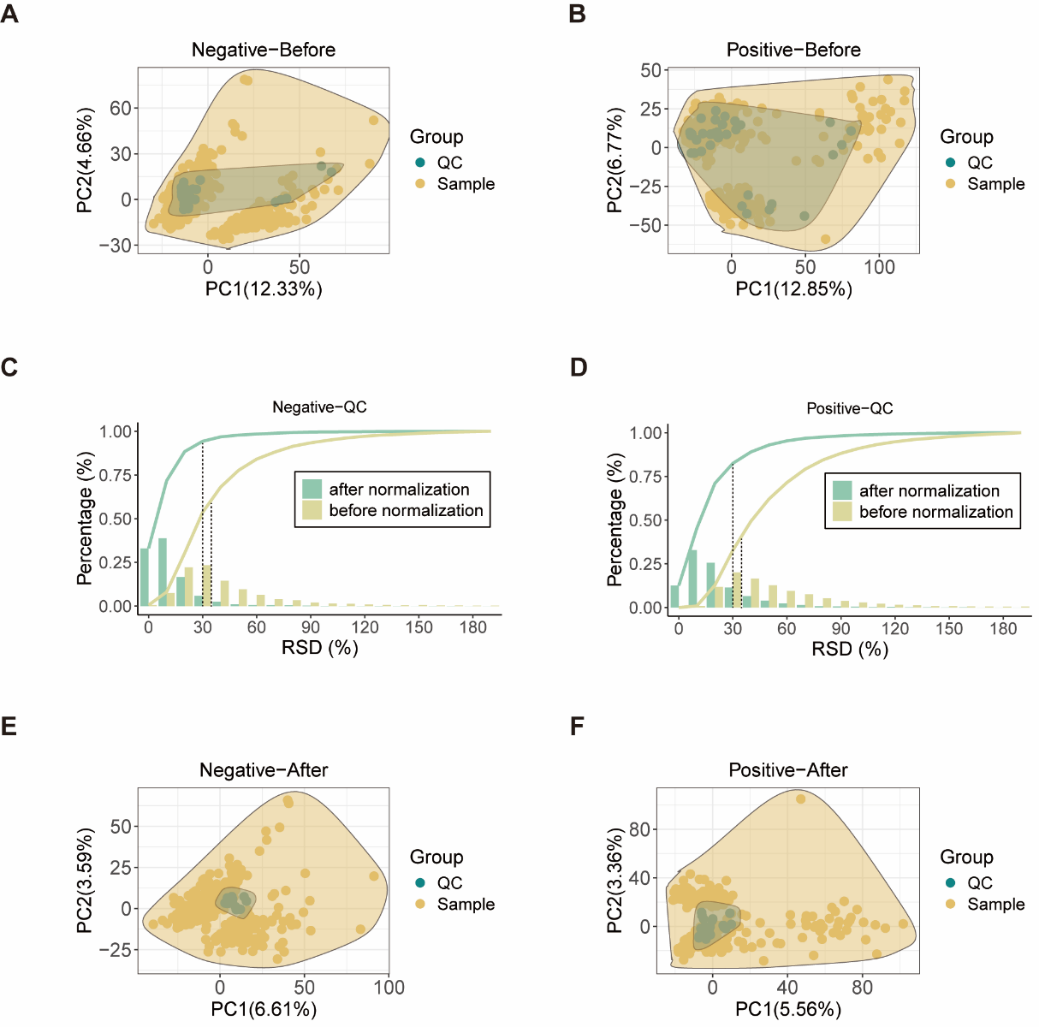 |
| --- |
| Figure S 1 Batch Correction of Metabolomics Data Based on Support Vector Regression.  (A) PCA of samples in negative ion mode.  (B) PCA of samples in positive ion mode.  (C) Distribution of Relative Standard Deviation (RSD) of QC samples in positive ion mode (before vs after correction).  (D) Distribution of RSD of QC samples in negative ion mode (before vs after correction).  (E) PCA of samples in negative ion mode (after correction).  (F) PCA of samples in positive ion mode (after correction). |

| 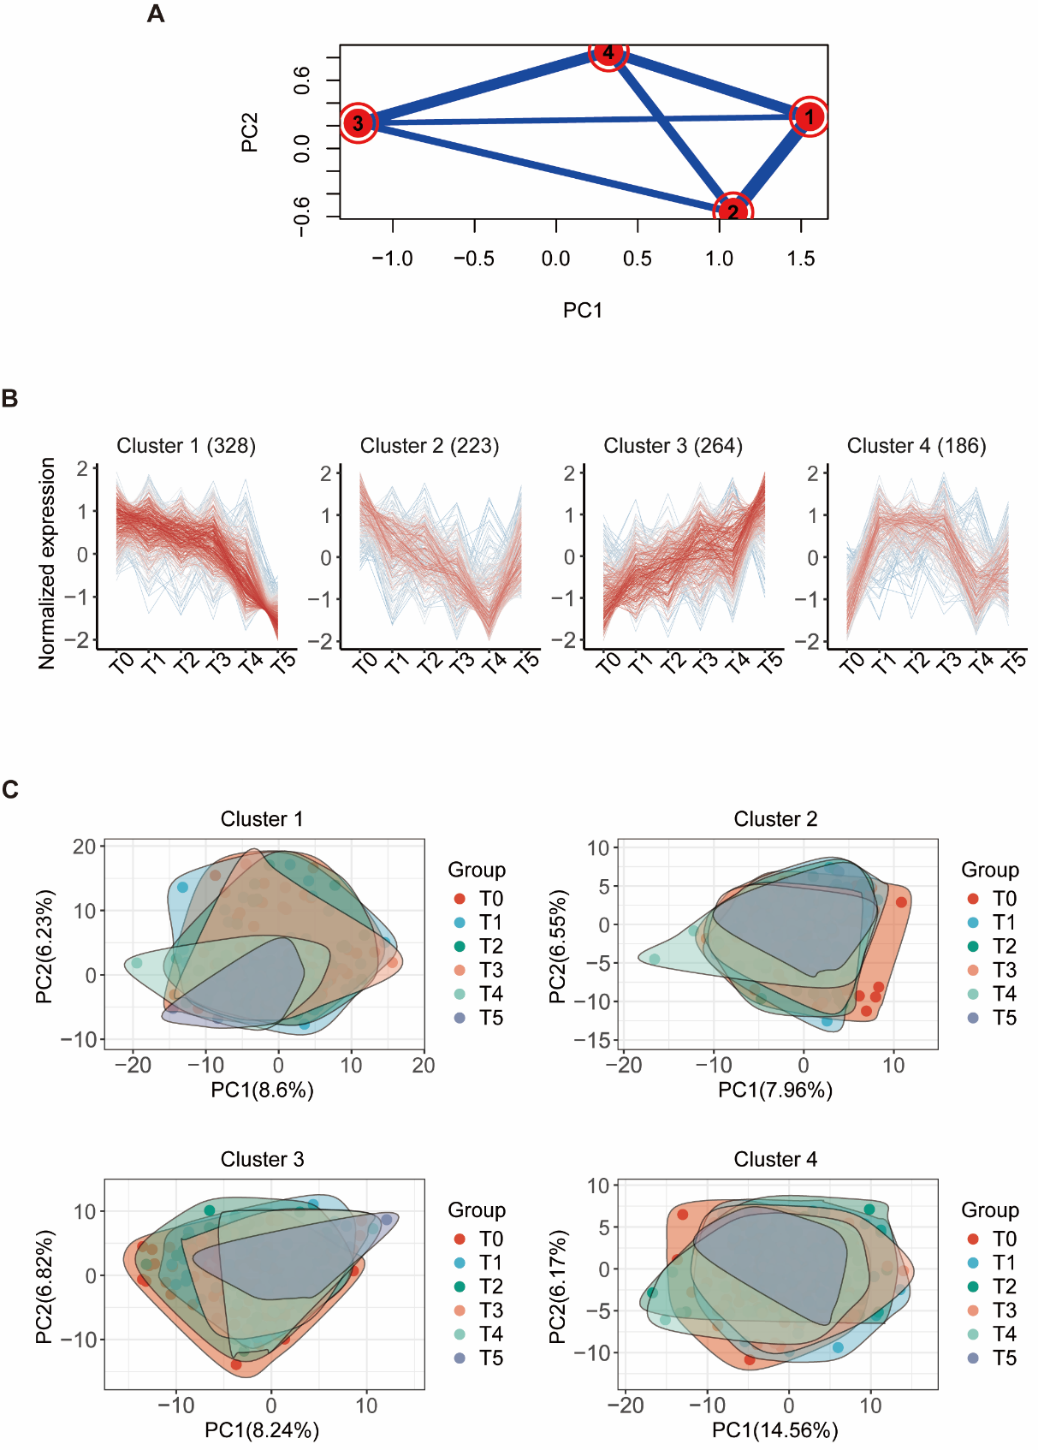 |
| --- |
| Figure S 2 Dynamic trajectory analysis of the metabolic landscape following NAIC therapy in gastric cancer.  (A) Flowchart of the collection and analysis process for 369 blood samples.  (B) Principal component analysis (PCA) results, illustrating the dynamic changes in the metabolic landscape during NAIC therapy. Each data point represents the average metabolite levels across all patients.  (C) Overview of Mufzz time-series analysis, including clustering results (4 characteristic clusters), heatmaps of each cluster, and the corresponding top 5 significantly perturbed metabolic pathways.  (D) Dynamic trends of key metabolites within each cluster during the treatment process, with the y-axis representing the mean expression levels of metabolites normalized by Z-score. |

| 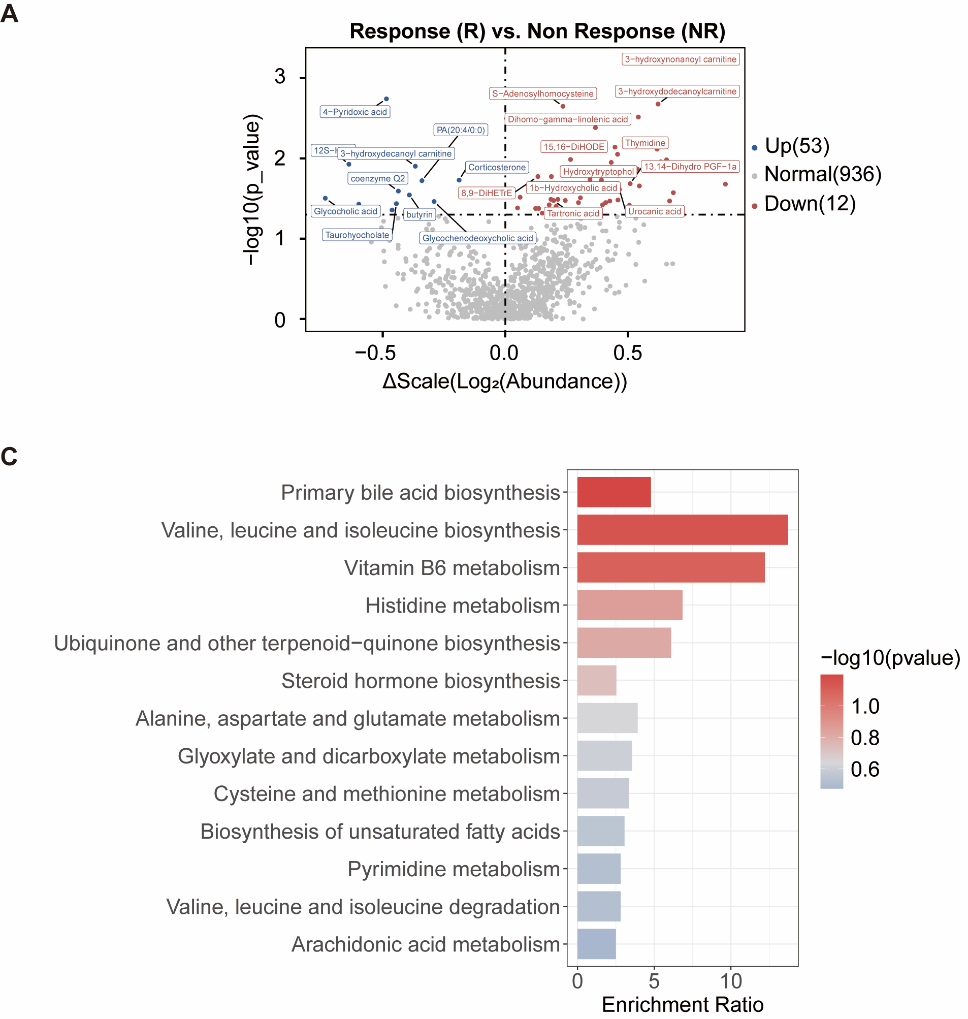 |
| --- |
| Figure S 3 Analysis of Differences in Metabolites Between the NAIC Treatment R Group and NR Group in GC.  (A) The volcano plot depicts the differences in metabolites between the NAIC treatment R and NR groups. Metabolites with red circles were considerably elevated in the responder group (*P* < 0.05), while those with blue circles were significantly downregulated (*P* < 0.05). Metabolites with gray circles showed no significant change.  (B) KEGG pathway enrichment analysis of various metabolites. |

| 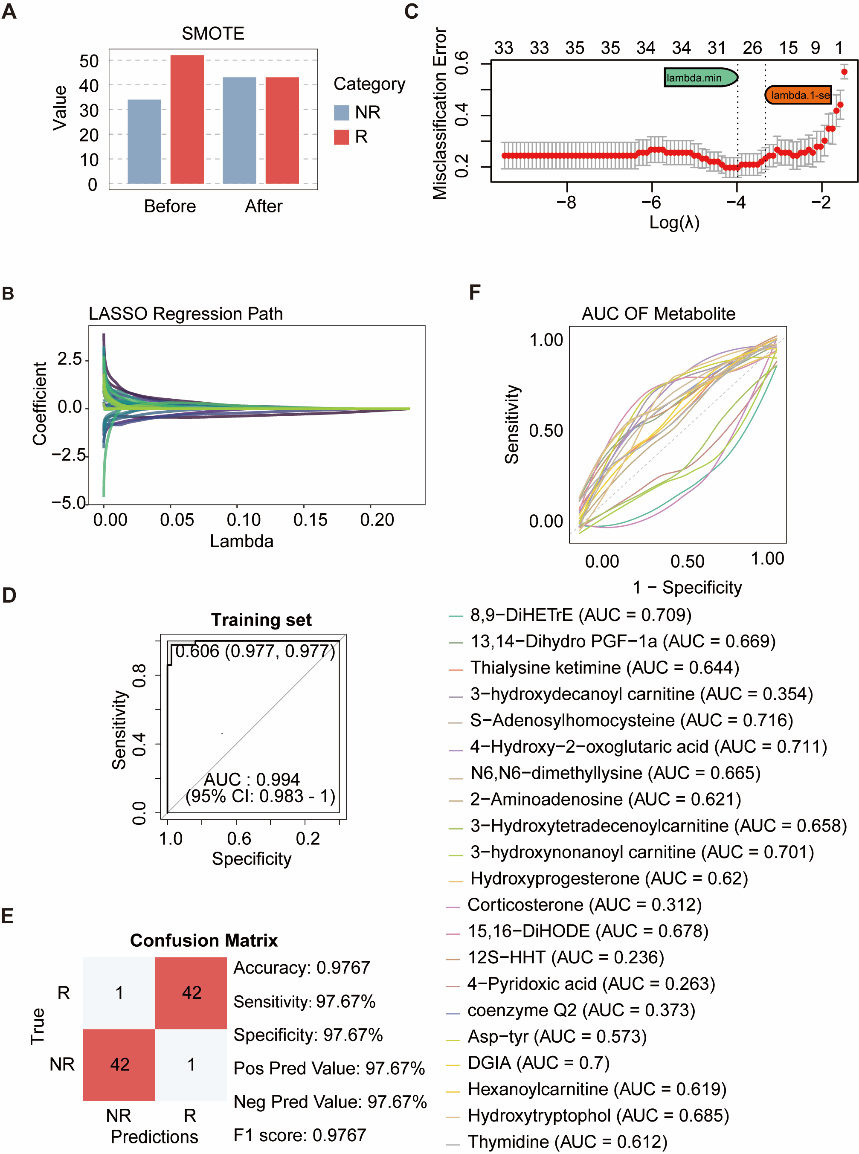 |
| --- |
| Figure S 4 Development of a predictive model for the success of NAIC therapy in gastric cancer using baseline plasma metabolic profiles.  (A) Response and non-responder distributions before and after SMOTE method application.  (B) Selection of LASSO regression coefficients.  (C) Mean squared error versus Log(λ) in LASSO regression.  (D) Performance evaluation of the 21-PM prediction model in the training set using ROC curve analysis.  (E) Performance evaluation of the 21-PM prediction model in the training set: confusion matrix with evaluation metrics (accuracy, sensitivity, specificity, and recall).  (F) Evaluation of individual predictive performance of selected metabolites (AUC values). |

| 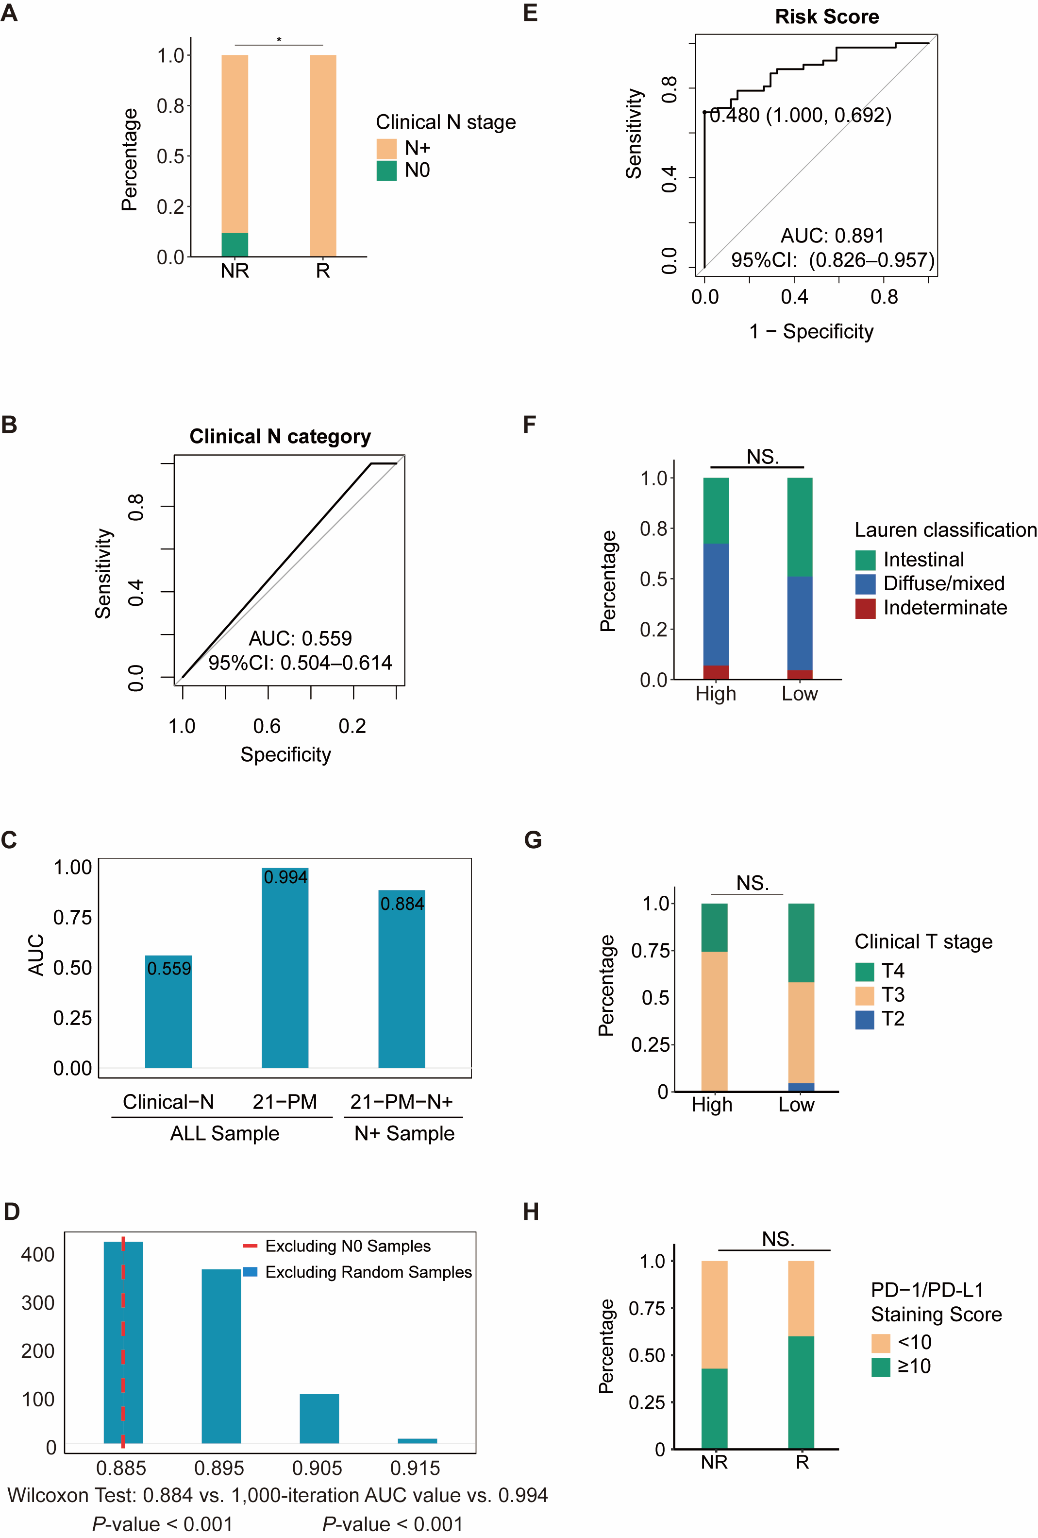 |
| --- |
| Figure S 5 Depicts the impact of clinical characteristics on the 21-PM model.  (A) Comparison of the pre-treatment N-stage distribution between the R and NR groups.  (B) Predictive performance of pre-treatment N-stage NAIC treatment efficacy.  (C) AUC value comparison: predictive performance of clinical N-stage alone, the 21-PM model in the entire cohort, and the 21-PM model after omitting four N0 patients.  (D) AUC value distribution for the 21-PM model based on 1000 bootstrap iterations (four patients were excluded at random each time).  (E) The predictive performance of risk scores for NAIC treatment efficacy.  (F) A comparison of pre-treatment N-stage distributions in high and low risk score groups.  (G) A comparison of Lauren classification distributions for high and low risk score groups.  (H) Levels of PD-1/PD-L1 expression in high and low risk score groups. |

| 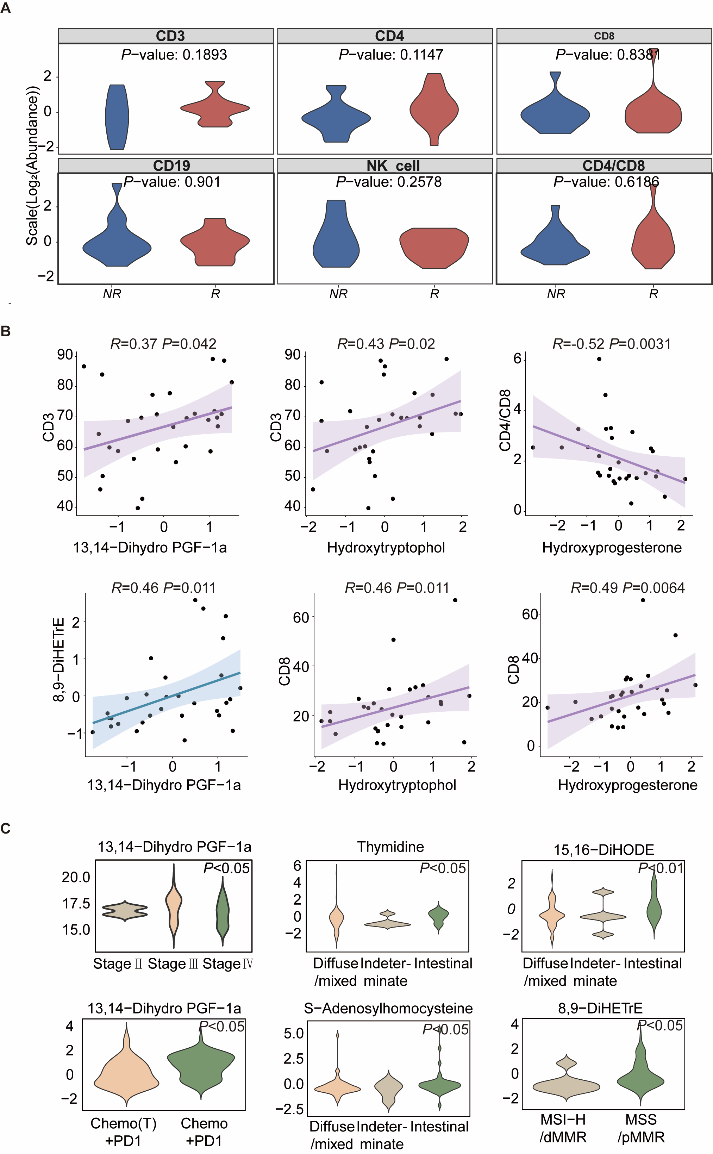 |
| --- |
| Figure S 6 Correlation analysis of key biomarkers with immune cells and clinical features.  (A) Differential analysis of immune cell expression between R and NR groups.  (B) Correlation analysis of key biomarkers with immune cells: 13,14-Dihydro PGF−1α with CD3 and 8,9-DiHETrE; hydroxytryptophol with CD3 and CD8; hydroxyprogesterone with CD4 and CD8.  (C) Clinical feature analysis of key biomarkers: 13,14-Dihydro PGF−1α, 8,9-DiHETrE, thymidine, S-adenosylhomocysteine, and 15,16-DiHODE in relation to clinical features. |

| 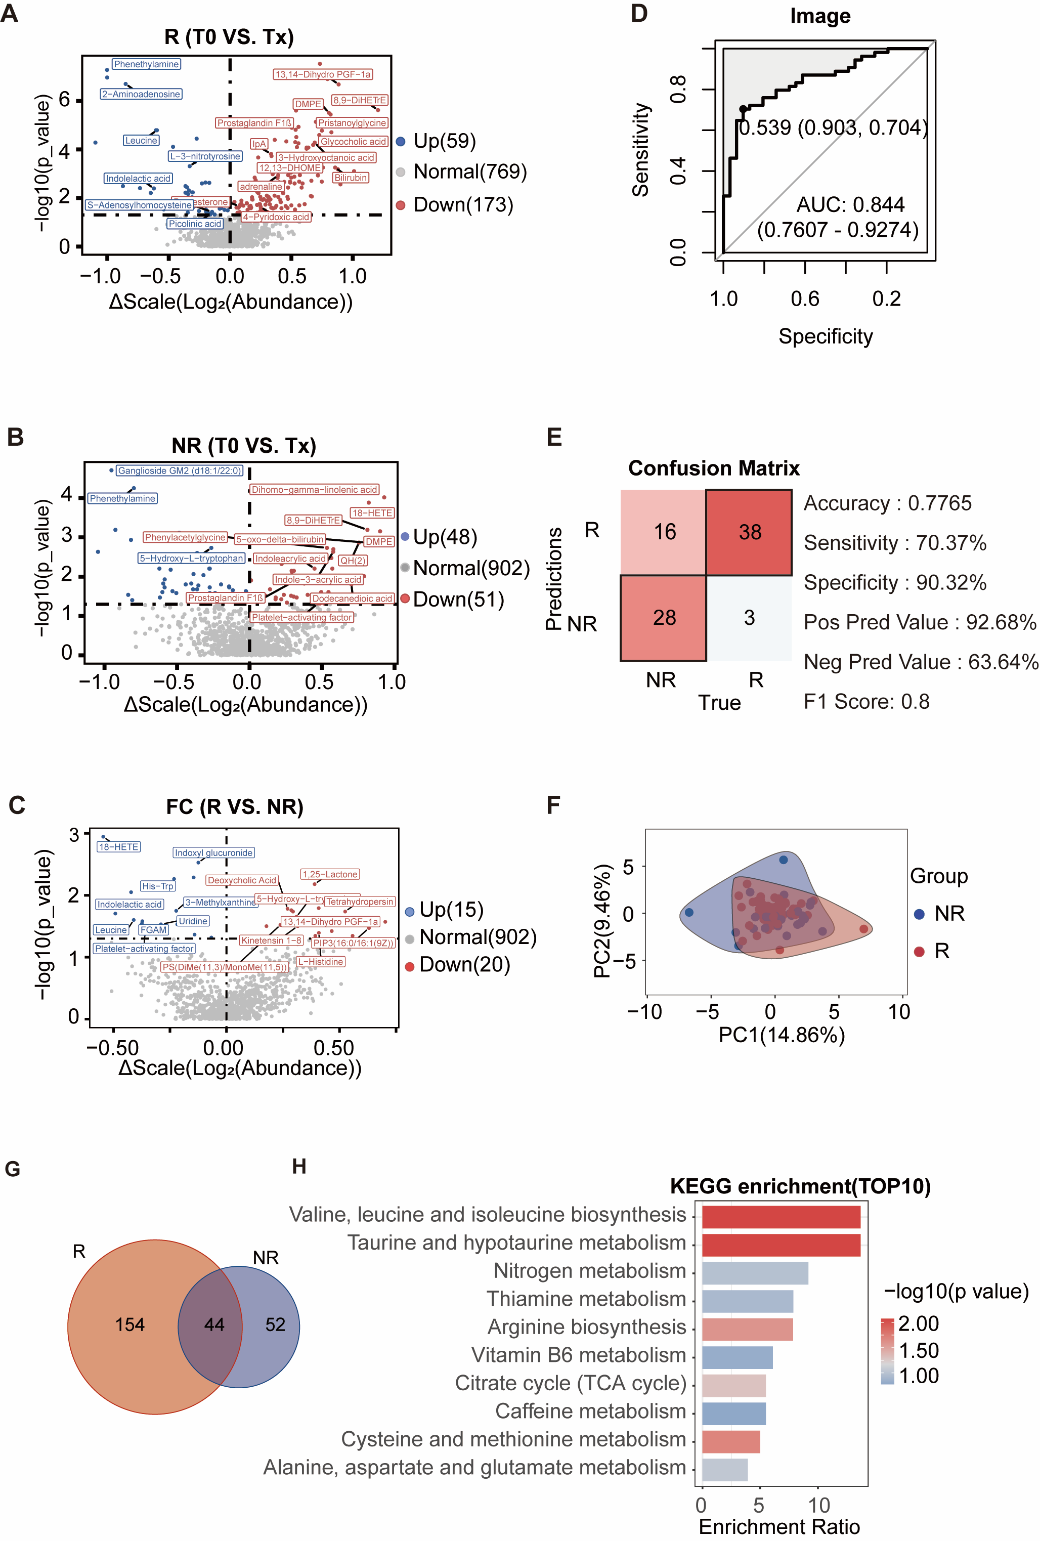 |
| --- |
| Figure S 7 Analysis of treatment response characteristics based on metabolic dynamics and exploration of monitoring biomarkers.  (A) Volcano plot of paired differences between baseline (T0) and key treatment timepoint (Tx) in the R group.  (B) Volcano plot of paired differences (T0 vs Tx) in the NR group.  (C) Volcano plot of FC value differences between R and NR groups.  (D) ROC curve showing the efficacy of baseline 21-PM metabolites in treatment monitoring.  (E) Confusion matrix evaluating the performance of baseline 21-PM metabolites in treatment monitoring.  (F) PCA analysis of FC values from baseline 21-PM metabolites for treatment outcome monitoring. (G) Venn diagram of differential metabolites between R and NR groups, showing shared and group-specific metabolites.  (H) KEGG pathway enrichment analysis of R-specific metabolites unique to imaging outcomes. |

| 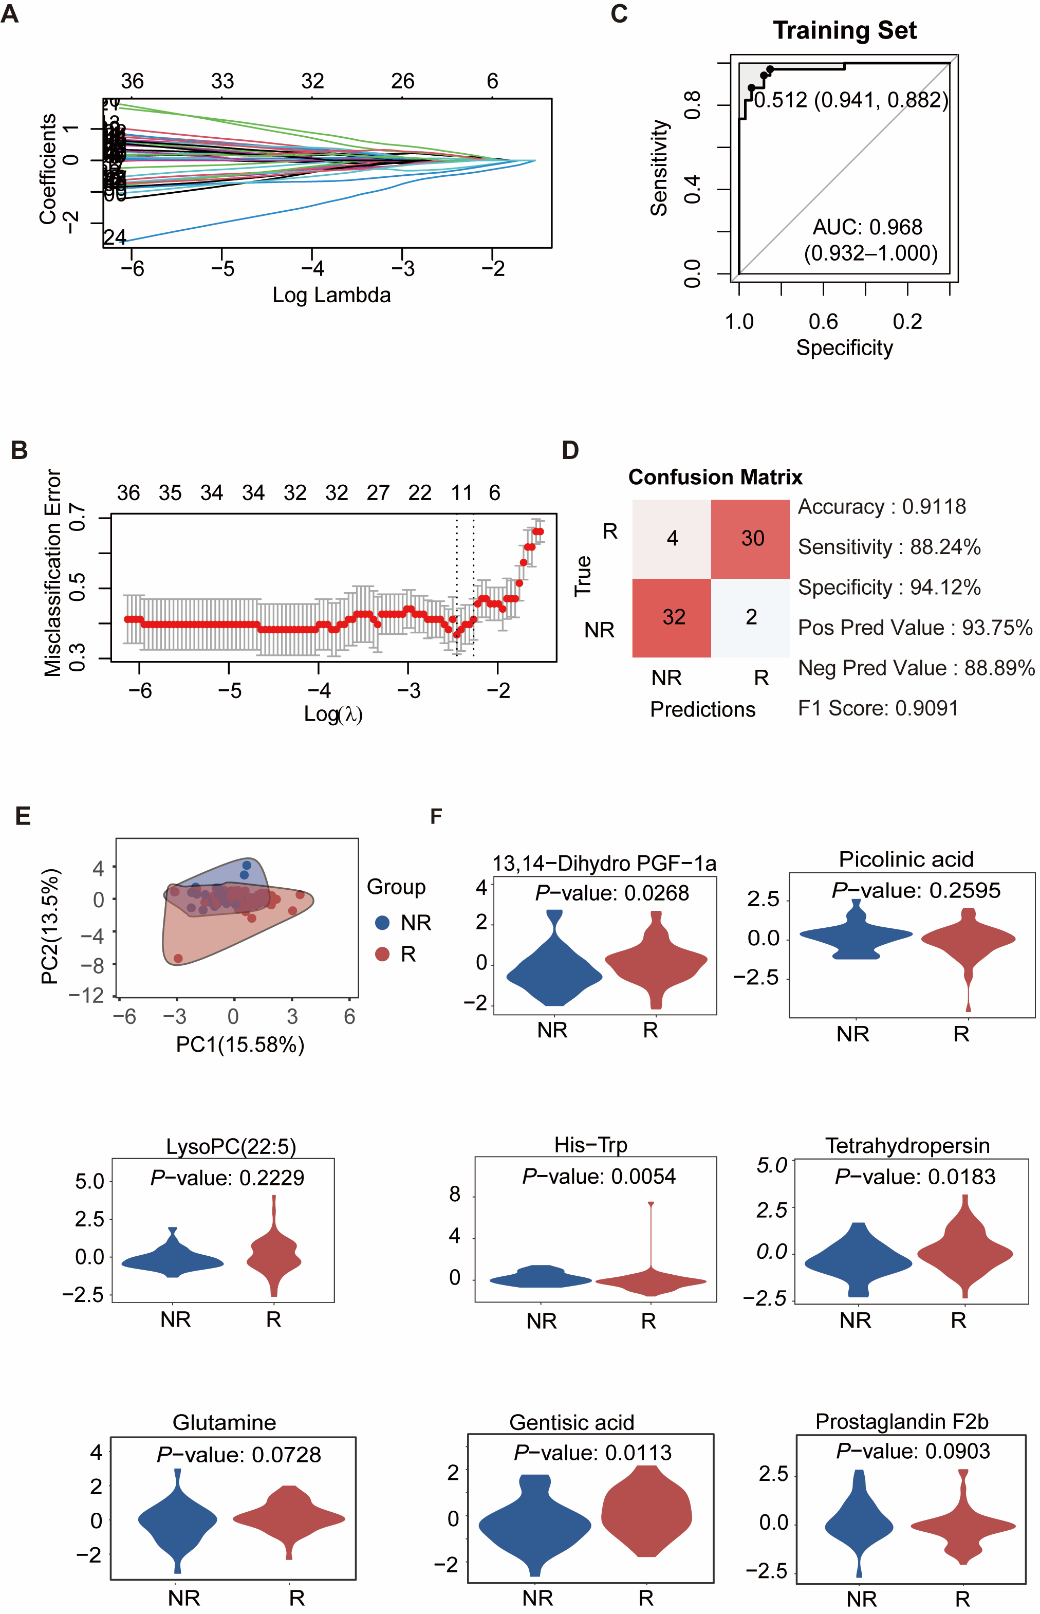 |
| --- |
| Figure S 8 Construction of treatment efficacy monitoring model.  (A) Selection of LASSO regression coefficients.  (B) Mean squared error versus Log(λ) in LASSO regression.  (C) ROC curve analysis of the 11-MMI model in the training set.  (D) Confusion matrix of the 11-MMI model in the training set.  (E) PCA analysis of FC values for the 11 biomarker metabolites.  (F) Violin plots showing expression differences of monitoring biomarkers between R and NR groups. |

| 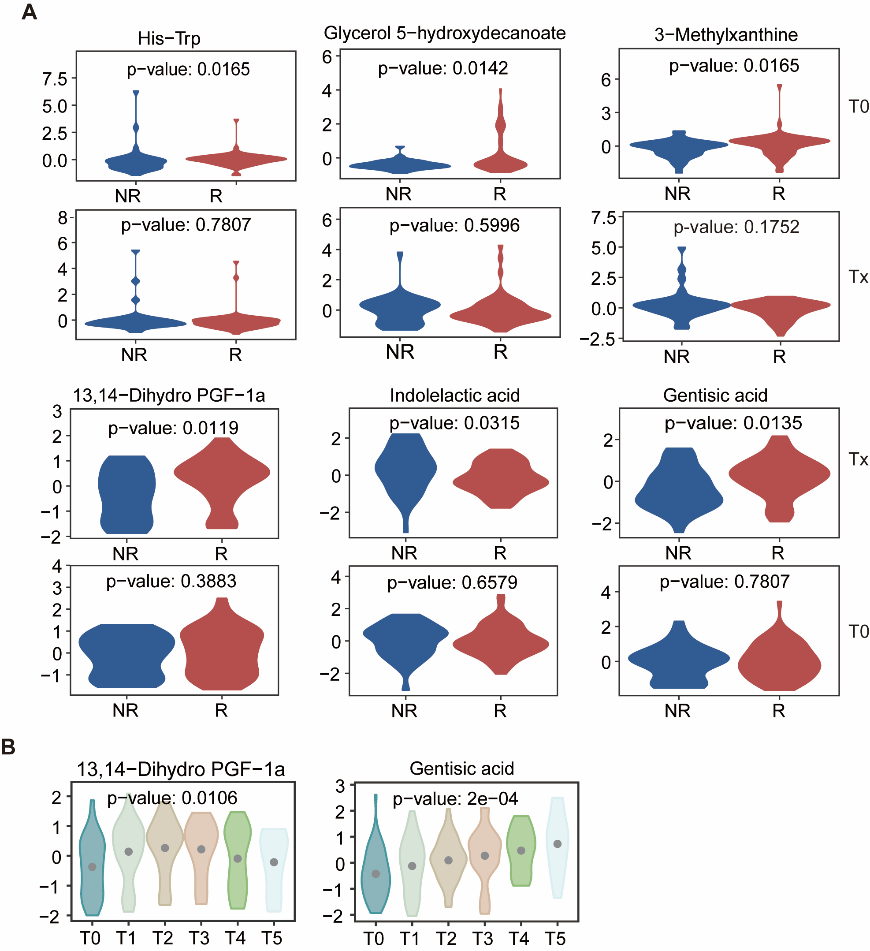 |
| --- |
| Figure S 9 Exploratory analysis of therapeutic monitoring biomarkers.  (A) Differential analysis of monitoring biomarkers at baseline versus key therapeutic timepoints.  (B) Longitudinal analysis of 13,14−Dihydro PGF−1α and Gentisic acid across five treatment timepoints. |

| 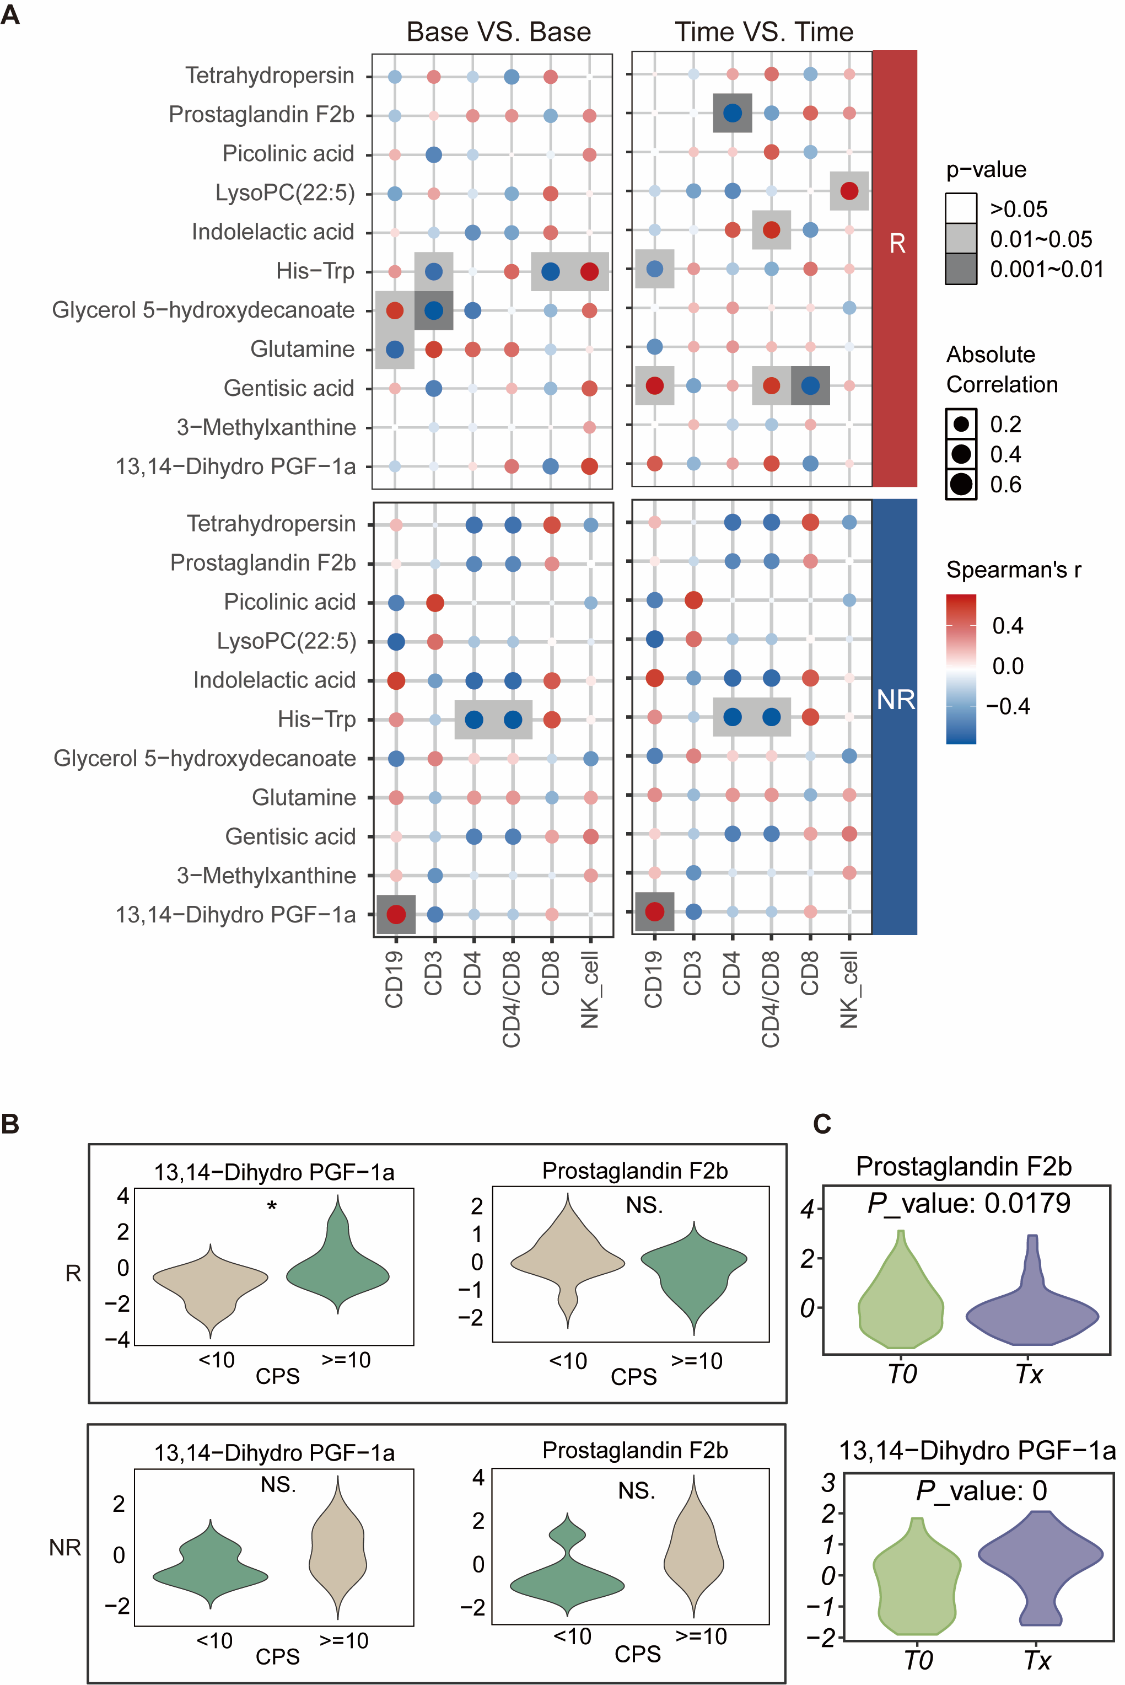 |
| --- |
| Figure S 10 Immune-related analysis of imaging-based therapeutic monitoring biomarkers.  (A) Correlation analysis between 11 monitoring biomarkers and immune cell phenotypes in R and NR groups.  (B) Differential analysis of 13,14−Dihydro PGF−1α and Prostaglandin F2β by CPS scores in R and NR groups.  (C) Differential expression of 13,14−Dihydro PGF−1α and Prostaglandin F2β between T0 and Tx in R and NR groups. |

| 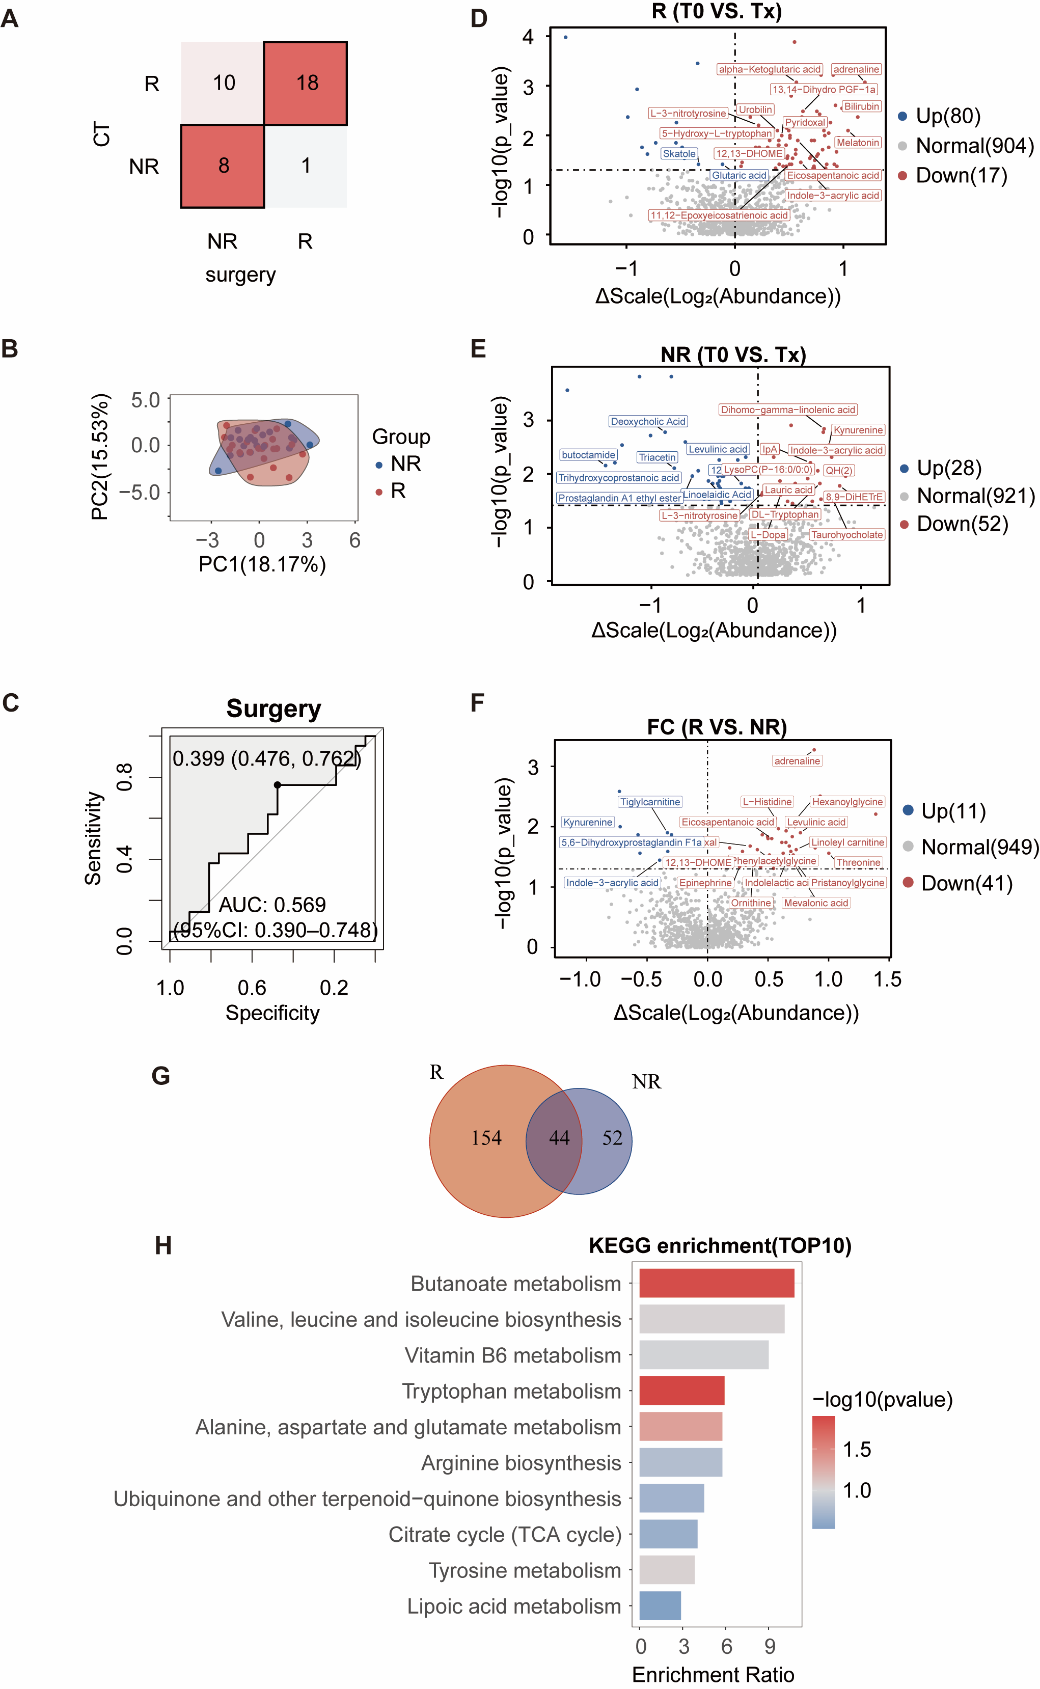 |
| --- |
| Figure S 11 Differential feature analysis based on histopathological efficacy endpoints.  (A) Consistency analysis between imaging and pathological evaluation results (CT-R/NR vs. pathological-R/NR matching).  (B) PCA of metabolites in the 11-MMI model based on histopathological outcomes.  (C) ROC curve analysis of the 11-MMI model for predicting pathological efficacy.  (D) Volcano plot of differential metabolites between T0 and preoperative (TS) in the R group.  (E) Volcano plot of differential metabolites between T0 and TS in the NR group.  (F) Volcano plot of FC value differences between R and NR groups.  (H) KEGG pathway enrichment analysis of R-specific metabolites unique to pathology outcomes. |

| 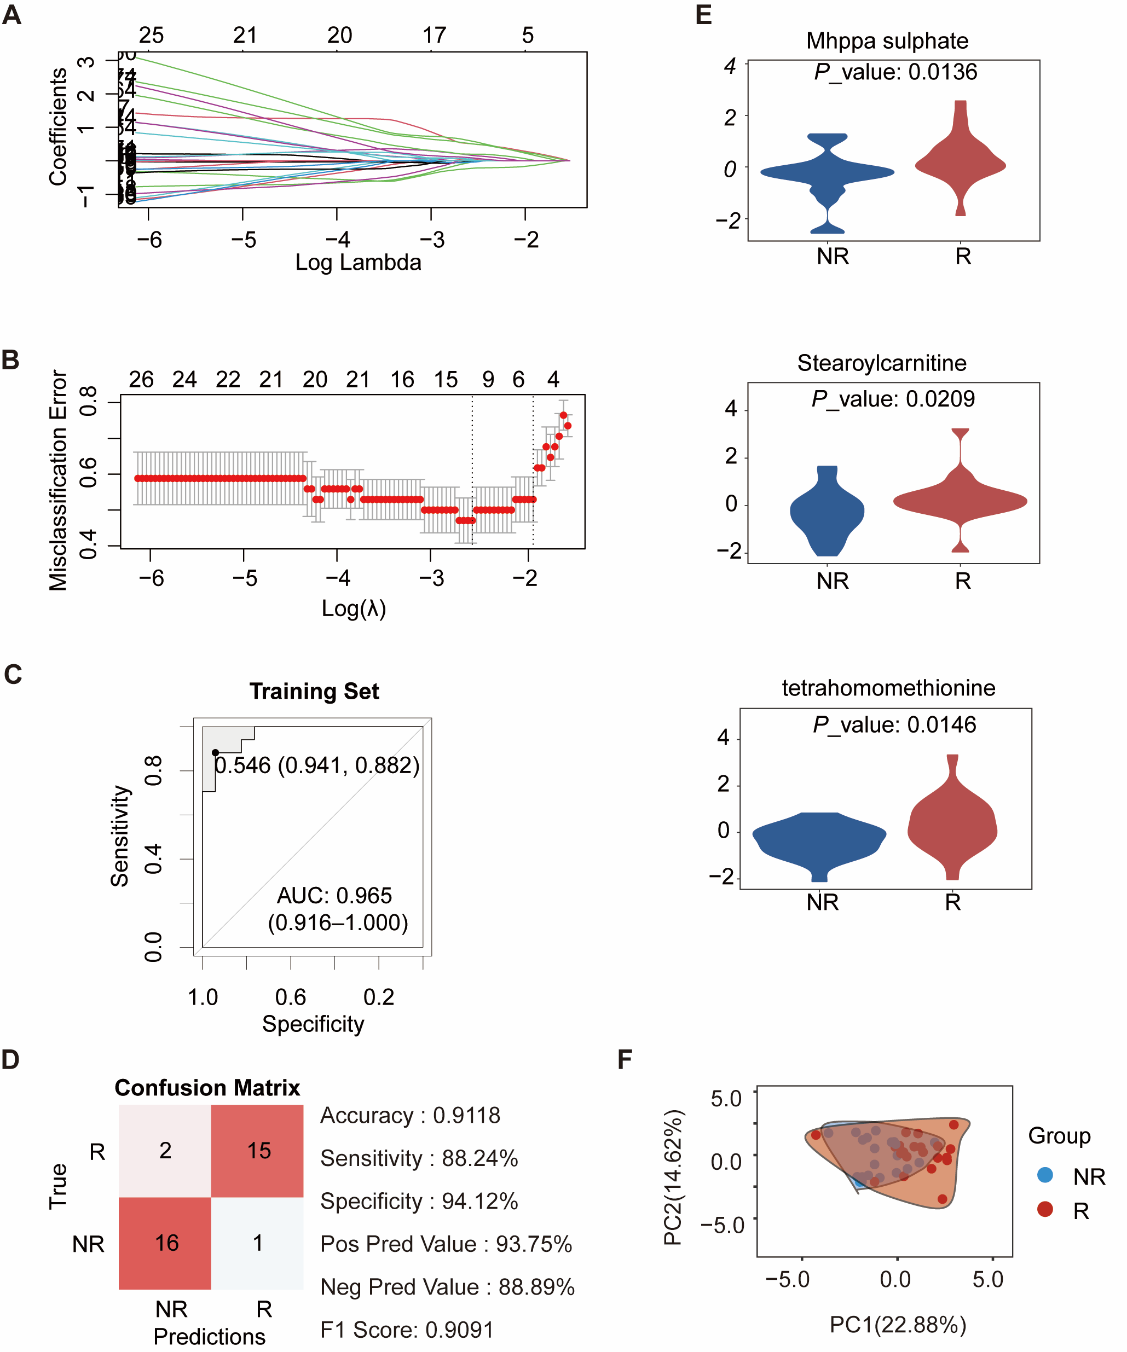 |
| --- |
| Figure S 12 Therapeutic monitoring model development based on histopathological outcomes.  (A) LASSO regression coefficient selection.  (B) Mean squared error versus Log(λ) in LASSO regression.  (C) ROC analysis of 13-MMP model (training set)  (D) Confusion matrix of 13-MMP model (training set)  (E) FC differences of Mhppa sulphate/Stearoylcarnitine/Tetrahomomethionine (R vs. NR)  (F) PCA of 13 biomarker FC values in 13-MMP model. |

| 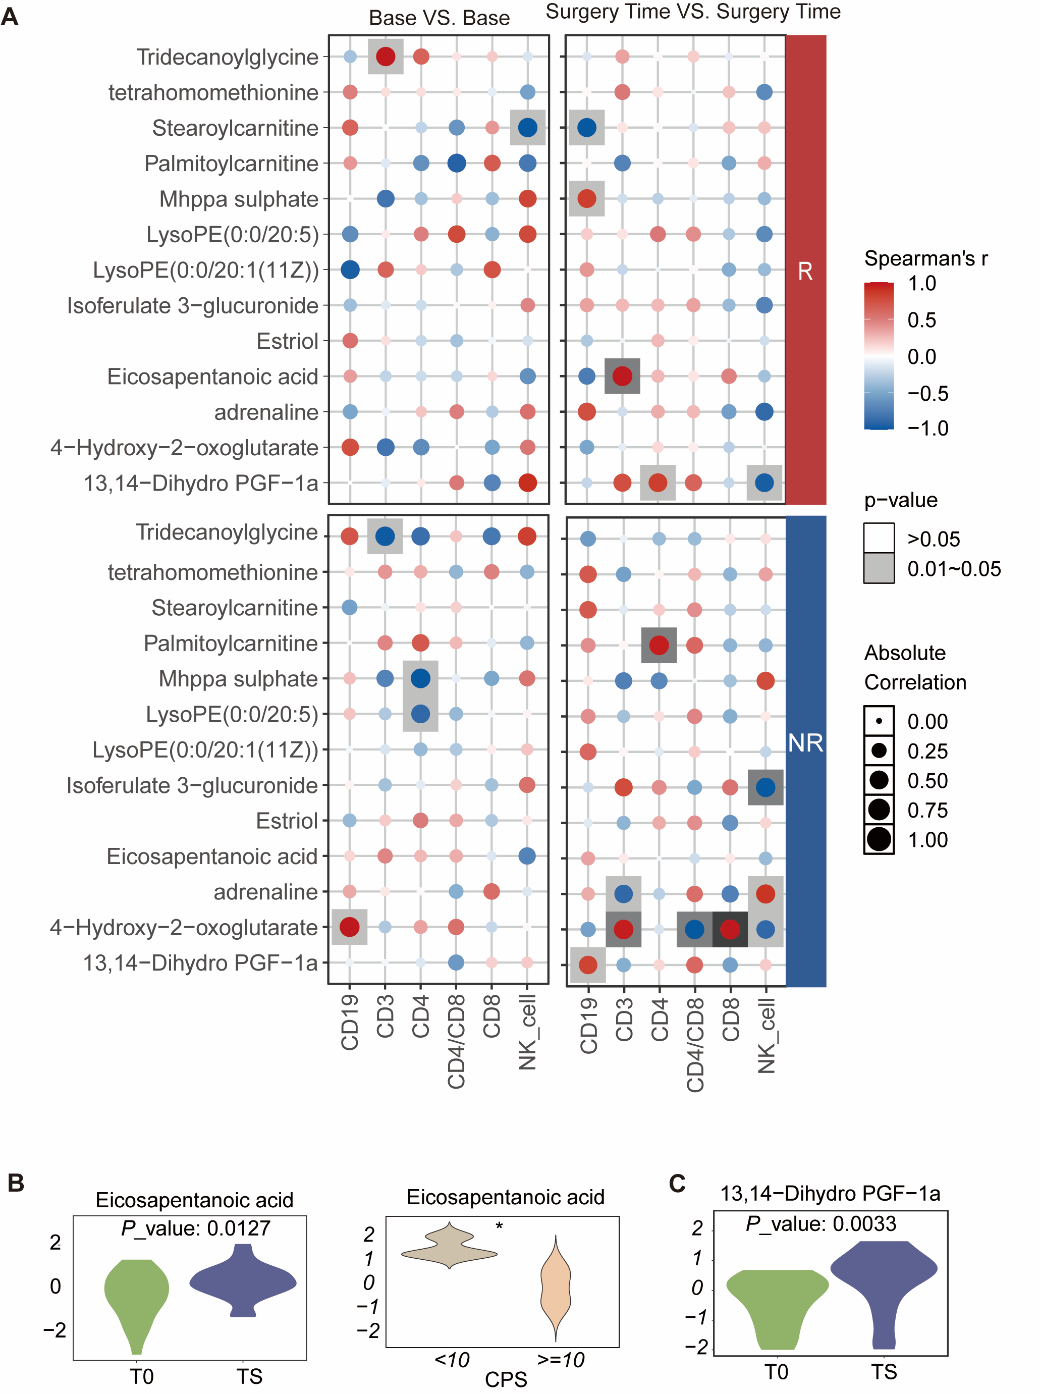 |
| --- |
| Figure S 13 Immune correlation analysis of histopathology-based therapeutic monitoring biomarkers.  (A) Biomarker-immune cell phenotype correlations in R versus NR groups.  (B) Eicosapentanoic acid level differences (T0 vs TS) and fold-change (FC) comparisons stratified by CPS scores in R group.  (C) 13,14-Dihydro-PGF-1α expression changes between T0 and TS in R group. |

**Table S**

Table S 1 Baseline clinical features of the GC NAIC treatment population

|  | Total | Any grade | Grade1-2 | Grade3-4 |
| --- | --- | --- | --- | --- |
| Fatigue | 59 | 47(79.66%) | 45(76.27%) | 2(3.39%) |
| Fever | 59 | 8(13.56%) | 7(11.86%) | 1(1.69%) |
| Palmar-plantar erythrodysesthesia syndrome | 59 | 8(13.56%) | 8(13.56%) | 0(0%) |
| Anorexia | 59 | 44(74.58%) | 28(47.46%) | 16(27.12%) |
| Constipation | 59 | 5(8.47%) | 5(8.47%) | 0(0%) |
| Diarrhea | 59 | 25(42.37%) | 23(38.98%) | 2(3.39%) |
| Mucositis | 59 | 8(13.56%) | 7(11.86%) | 1(1.69%) |
| Vomiting | 59 | 34(57.63%) | 29(49.15%) | 5(8.47%) |
| Nausea | 59 | 51(86.44%) | 36(61.02%) | 15(25.42%) |
| Limb numbness | 59 | 26(44.07%) | 26(44.07%) | 0(0%) |
| White blood cell decreased | 105 | 62(59.05%) | 54(51.43%) | 8(7.62%) |
| Neutrophil count decreased | 105 | 60(57.14%) | 49(46.67%) | 11(10.48%) |
| Lymphocyte count decreased | 105 | 53(50.48%) | 33(31.43%) | 20(19.05%) |
| Platelet count decreased | 105 | 37(35.24%) | 29(27.62%) | 8(7.62%) |
| Anemia | 105 | 84(80%) | 68(64.76%) | 16(15.24%) |
| Alanine aminotransferase increased | 103 | 23(22.33%) | 23(22.33%) | 0(0%) |
| Aspartate aminotransferase increased | 103 | 40(38.83%) | 40(38.83%) | 0(0%) |
| Creatinine increased | 102 | 17(16.67%) | 16(15.69%) | 1(0.98%) |
| Blood bilirubin increased | 103 | 10(9.71%) | 6(5.83%) | 4(3.88%) |
| Alopecia | 59 | 16(27.12%) | 12(20.34%) | 4(6.78%) |
| Hyperpigmentation | 59 | 10(16.95%) | 4(6.78%) | 6(10.17%) |
| Dysgeusia | 59 | 20(33.9%) | 6(10.17%) | 14(23.73%) |

Table S 2 Multifactor logistic regression

| Dependent variable: Response | R (N=52) | | NR (N=34) | OR (multivariable) |
| --- | --- | --- | --- | --- |
| Age (n, %) | | | | |
| <60 | | 17 (32.70) | 14 (41.20) |  |
| ≥60 | | 35 (67.30) | 20 (58.80) | 0.60 (017-210, *P*=425) |
| Gender (n, %) | | | | |
| female | | 14 (26.90) | 10 (29.40) |  |
| male | | 38 (73.10) | 24 (70.60) | 0.68 (016-282, *P*=592) |
| Lauren classification (n, %) | | | | |
| Diffuse/mixed | | 26 (50.00) | 20 (58.80) |  |
| Indeterminate | | 2 (38.00) | 3 (88.00) | 3.88 (028-5387, *P*=312) |
| Intestinal | | 24 (46.20) | 11 (32.40) | 0.91 (022-378, *P*=895) |
| Tumor site (n, %) | | | | |
| GC | | 38 (73.10) | 29 (85.30) |  |
| GEJ | | 14 (26.90) | 5 (14.70) | 1.36 (027-688, *P*=713) |
| Clinical N stage (n, %) | | | | |
| N+ | | 52 (100.00) | 30 (88.20) |  |
| N0 | | 0 (0) | 4 (11.80) | 27453643.50 (000-Inf, *P*=993) |
| Risk score (n, %) | | | | |
| High | | 13 (25.00) | 30 (88.20) |  |
| Low | | 39 (75.00) | 4 (11.80) | 0.05 (001-019, *P*<001) |
| Therapy (n, %) | | | | |
| Chemo(T)+PD1 | | 9 (17.30) | 11 (32.40) |  |
| Chemo+PD1 | | 43 (82.70) | 23 (67.60) | 0.52 (013-215, *P*=369) |

Table S 3 Baseline clinical features of the GC NAIC treatment population for Surgery people

|  | Total (n = 42) | NR (n = 21) | R (n = 21) | P |
| --- | --- | --- | --- | --- |
| Age, n (%) |  |  |  | 0.334 |
| <60 | 15 (35.71) | 6 (28.57) | 9 (42.86) |  |
| ≥60 | 27 (64.29) | 15 (71.43) | 12 (57.14) |  |
| Gender, n (%) |  |  |  | 0.495 |
| Female | 12 (28.57) | 7 (33.33) | 5 (23.81) |  |
| Male | 30 (71.43) | 14 (66.67) | 16 (76.19) |  |
| BMI, n (%) |  |  |  | 0.707 |
| BMI<18.5 | 4 (9.52) | 1 (4.76) | 3 (14.29) |  |
| 18.5≤BMI<24 | 28 (66.67) | 15 (71.43) | 13 (61.90) |  |
| 24≤BMI<28 | 9 (21.43) | 5 (23.81) | 4 (19.05) |  |
| BMI≥28 | 1 (2.38) | 0 (0.00) | 1 (4.76) |  |
| ECOG, n (%) |  |  |  | 1.000 |
| 0 | 36 (85.71) | 18 (85.71) | 18 (85.71) |  |
| 1 | 6 (14.29) | 3 (14.29) | 3 (14.29) |  |
| Differentiation status, n (%) |  |  |  | 0.719 |
| High | 9 (21.43) | 3 (14.29) | 6 (28.57) |  |
| Poor | 31 (73.81) | 17 (80.95) | 14 (66.67) |  |
| Unknown | 2 (4.76) | 1 (4.76) | 1 (4.76) |  |
| Lauren classification, n (%) |  |  |  | 0.538 |
| Diffuse/mixed | 20 (47.62) | 11 (52.38) | 9 (42.86) |  |
| Indeterminate | 1 (2.38) | 1 (4.76) | 0 (0.00) |  |
| Intestinal | 21 (50.00) | 9 (42.86) | 12 (57.14) |  |
| Tumor site, n (%) |  |  |  | 1.000 |
| GC | 28 (66.67) | 14 (66.67) | 14 (66.67) |  |
| GEJ | 14 (33.33) | 7 (33.33) | 7 (33.33) |  |
| HER2 status, n (%) |  |  |  | 0.504 |
| 0 | 18 (45.00) | 9 (45.00) | 9 (45.00) |  |
| 1+ | 13 (32.50) | 5 (25.00) | 8 (40.00) |  |
| 2+ | 7 (17.50) | 4 (20.00) | 3 (15.00) |  |
| 3+ | 2 (5.00) | 2 (10.00) | 0 (0.00) |  |
| EBER status, n (%) |  |  |  | 0.182 |
| Negative | 34 (87.18) | 19 (95.00) | 15 (78.95) |  |
| Positive | 5 (12.82) | 1 (5.00) | 4 (21.05) |  |
| MSI/MMR status, n (%) |  |  |  | 1.000 |
| MSI-H/dMMR | 4 (10.00) | 2 (10.00) | 2 (10.00) |  |
| MSS/pMMR | 36 (90.00) | 18 (90.00) | 18 (90.00) |  |
| CPS, n (%) |  |  |  | 0.603 |
| <1 | 4 (23.53) | 2 (28.57) | 2 (20.00) |  |
| 1-5 | 2 (11.76) | 1 (14.29) | 1 (10.00) |  |
| 5-10 | 1 (5.88) | 1 (14.29) | 0 (0.00) |  |
| ≥10 | 10 (58.82) | 3 (42.86) | 7 (70.00) |  |
| Clinical Stage, n (%) |  |  |  | 0.307 |
| Stage Ⅱ | 2 (4.76) | 2 (9.52) | 0 (0.00) |  |
| Stage Ⅲ | 24 (57.14) | 10 (47.62) | 14 (66.67) |  |
| Stage Ⅳ | 16 (38.10) | 9 (42.86) | 7 (33.33) |  |
| Clinical T category, n (%) |  |  |  | 0.371 |
| T2 | 2 (4.76) | 1 (4.76) | 1 (4.76) |  |
| T3 | 10 (23.81) | 3 (14.29) | 7 (33.33) |  |
| T4 | 30 (71.43) | 17 (80.95) | 13 (61.90) |  |
| Clinical N category, n (%) |  |  |  | 0.469 |
| N+ | 40 (95.24) | 19 (90.48) | 21 (100.00) |  |
| N0 | 2 (4.76) | 2 (9.52) | 0 (0.00) |  |
| Clinical M category, n (%) |  |  |  | 0.513 |
| M0 | 28 (66.67) | 13 (61.90) | 15 (71.43) |  |
| M1 | 14 (33.33) | 8 (38.10) | 6 (28.57) |  |
| Therapy, n (%) |  |  |  | 1.000 |
| Chemo(T)+PD1 | 7 (16.67) | 4 (19.05) | 3 (14.29) |  |
| Chemo+PD1 | 35 (83.33) | 17 (80.95) | 18 (85.71) |  |
| Becker, n (%) |  |  |  | <.001 |
| 1a | 12 (28.57) | 0 (0.00) | 12 (57.14) |  |
| 1b | 9 (21.43) | 0 (0.00) | 9 (42.86) |  |
| 2 | 10 (23.81) | 10 (47.62) | 0 (0.00) |  |
| 3 | 11 (26.19) | 11 (52.38) | 0 (0.00) |  |
| Yp Stage, n (%) |  |  |  | <.001 |
| pCR | 12 (28.57) | 0 (0.00) | 12 (57.14) |  |
| I | 6 (14.29) | 1 (4.76) | 5 (23.81) |  |
| II | 13 (30.95) | 9 (42.86) | 4 (19.05) |  |
| III | 8 (19.05) | 8 (38.10) | 0 (0.00) |  |
| IV | 3 (7.14) | 3 (14.29) | 0 (0.00) |  |
